# Supplementary material for: Comparison of the Respiratory Tractmicrobiome in Hospitalized COVID-19 Patients with Different Disease Severity
Source: Research Square preprint supplement (doi:10.21203/rs.3.rs-1237564/v1), 2022-01-12
Supplement: Supplementary file 1 [file c4f4ab6acaaa5d62e3707aa2.xlsx]

## Sheet: Readme
Readme
Table	Title	Notes
S1	Detailed information of 69 inpatients with COVID-19	(1)binomial variables：1 means "yes", 0 means "no"; (2)... means the lost data
S2	Relative abundance of bacterial microbiome among each samples at different levels	The table showed relative abundance of bacterial microbiome among each samples at phylum, class, order, family and genus levels
S3	Comparison the relative abundance of the top 10 bacterial microbiome between mild and severe groups	The top 10 relative abundance at the phylum, class, order, family and genus levels respectively were selected and assessed differences by Mann-Whitney U test in two groups
S4	Rank correlation coefficients between clinical characteristics and top 10 genera	(1)binomial variables：1 means "yes", 0 means "no", and were assigned as dummy variables and then explored the relationships directly through the spearman’s rank test.

## Sheet: S1
										Supplementary Table S1:Detailed information of 69 inpatients with COVID-19
Sample_id	Group	Sample_type	COVID-19_symptoms	Age (years)	BMII (kg/m2)	Inpatient_days	Sex	Cough	Diarrhea	Dyspnea	Coexisting_disorders(any)	Hypertension	Cardiopathy	ICU_admission	Death_during_hospitalization	SARS-CoV-2_IgG	SARS-CoV-2_IgM	White blood cell count (×10^9/L)	Neutrophil count(×10^9/L))	Lymphocyte count (×109/L	Hemoglobin (g/L)	C-reactive protein (mg/L)	Procalcitonin (ng/m)
SN01	Mild_group	nasopharyngeal swabs	moderate	31	25.4694	6	Male	1	0	0	0	0	0	0	0	190.08	32.05	6.7	3.85	2.15	140	2.3	0.04
SN02	Severe_group	sputum	critical	57	24.7721	10	Male	1	0	0	1	1	1	0	0	1.06	0.58	8.8	5.66	1.82	145	4.14	...
SN03	Mild_group	sputum	moderate	63	27.1203	12	Female	1	0	0	1	1	0	0	0	192.83	10.36	6	3.66	1.64	133	5.85	...
SN04	Mild_group	nasopharyngeal swabs	moderate	73	24.1415	12	Female	1	0	0	1	1	1	0	0	186.91	4.99	5.5	3.38	1.61	88	0.57	...
SN05	Severe_group	nasopharyngeal swabs	severe	62	26.8633	40	Male	1	0	1	1	1	1	1	1	39.29	2.25	10.6	9.31	0.85	133	117.18	0.38
SN06	Severe_group	nasopharyngeal swabs	severe	82	27.5391	36	Male	1	1	0	1	1	0	1	0	186	63.93	10.6	9.11	0.67	154	61.71	0.15
SN07	Severe_group	nasopharyngeal swabs	severe	63	26.4381	61	Female	1	1	1	1	1	0	1	0	165.89	39.45	12.9	11.9	0.7	112	49.37	2.42
SN08	Mild_group	nasopharyngeal swabs	moderate	54	24.6548	12	Female	1	0	0	1	1	0	0	0	172.8	62.23	4.8	3.38	1.01	109	8.65	0.02
SN09	Mild_group	nasopharyngeal swabs	moderate	72	25.8065	9	Female	1	0	0	1	1	0	0	0	202.92	7.6	5.2	2.94	1.58	117	1.44	0.02
SN10	Mild_group	nasopharyngeal swabs	moderate	57	38.0548	6	Female	1	0	0	1	1	1	0	0	2.05	2.02	6	4.14	1.43	132	2.54	0.2
SN11	Mild_group	nasopharyngeal swabs	moderate	63	25.9766	21	Male	0	1	0	1	0	0	0	0	104.93	152.84	6.3	4.09	1.53	126	1.99	...
SN12	Severe_group	nasopharyngeal swabs	severe	25	21.8776	28	Male	1	0	0	0	0	0	0	0	63.52	30.12	6.3	4.47	1.08	134	39.71	0.03
SN13	Mild_group	nasopharyngeal swabs	moderate	38	19.5965	7	Female	1	0	0	0	0	0	0	0	158.07	118.87	9.5	7.56	1.31	123	0.19	0.01
SN14	Severe_group	nasopharyngeal swabs	severe	85	16.8574	14	Female	1	0	0	1	1	1	0	0	179.01	54.82	3.1	1.94	0.73	86	15.24	0.15
SN15	Severe_group	nasopharyngeal swabs	severe	50	26.6667	17	Female	0	0	0	1	1	0	0	0	1.58	13.14	13.8	12.4	0.74	87	42.35	0.24
SN16	Mild_group	nasopharyngeal swabs	moderate	42	26.4381	20	Female	1	1	1	1	0	0	0	0	121.31	12.75	8.3	5.59	2.15	110	5.29	0.04
SN17	Severe_group	nasopharyngeal swabs	severe	91	16.8574	22	Female	1	0	0	1	1	1	0	0	193.49	16.64	5.6	4.1	1.04	107	42.01	0.04
SN18	Severe_group	nasopharyngeal swabs	severe	69	24.8603	32	Female	1	1	0	1	1	0	0	0	2.11	1.11	16.7	13.24	2.54	93	58.94	0.73
SN19	Severe_group	nasopharyngeal swabs	severe	82	16.8574	10	Female	1	0	0	1	1	1	0	0	197.62	5.72	7.2	5.08	1.51	103	42.54	0.12
SN20	Mild_group	nasopharyngeal swabs	moderate	81	15.8203	12	Female	1	0	0	1	0	0	0	0	5.65	2.41	4.7	2.41	1.79	101	4.04	0.04
SN21	Severe_group	nasopharyngeal swabs	severe	65	21.6311	20	Female	1	0	0	1	1	0	0	0	205.39	19.28	6.1	3.13	2.02	139	4.4	0.07
SN22	Mild_group	nasopharyngeal swabs	moderate	49	27.5482	23	Male	1	1	1	1	0	0	0	0	137.54	84.7	4.4	2.46	1.5	128	4.41	0.03
SN23	Mild_group	nasopharyngeal swabs	moderate	51	15.625	7	Female	1	0	0	1	0	0	0	0	233.09	5.44	25.1	22.4	1.65	124	137.52	0.45
SN24	Mild_group	nasopharyngeal swabs	moderate	62	25.6369	5	Female	1	0	0	0	0	0	0	0	248.31	27.42	5.6	3.23	1.98	122	1.01	0.04
SN25	Mild_group	nasopharyngeal swabs	moderate	54	26.079	17	Male	0	0	0	1	1	0	0	0	172.14	20.83	5.9	3.23	1.95	139	1.17	...
SN26	Severe_group	nasopharyngeal swabs	severe	49	22.8516	16	Female	1	0	0	1	0	0	0	0	158.55	9.15	9.5	5.32	2.91	93	4.56	0.04
SN27	Mild_group	nasopharyngeal swabs	moderate	25	24.5435	17	Male	1	0	0	0	0	0	0	0	25.15	2.29	7.8	4.26	2.91	158	4.28	0.03
SN28	Mild_group	sputum	moderate	52	25.2826	23	Male	1	1	0	0	0	0	0	0	162.26	191.44	4.5	2.43	1.41	113	3.49	0.05
SN29	Mild_group	sputum	moderate	65	24.677	45	Female	1	1	0	1	1	0	0	0	196.23	9.51	5	3.42	0.9	121	2.95	0.03
SN30	Severe_group	nasopharyngeal swabs	severe	84	16.8574	40	Female	1	0	1	1	1	0	1	1	226.05	54.85	8.9	8.15	0.48	105	78.43	0.61
SN31	Severe_group	nasopharyngeal swabs	critical	69	23.6328	16	Female	1	0	1	1	0	0	1	0	45	47.39	6.2	5.59	0.37	102	15.64	0.21
SN32	Mild_group	nasopharyngeal swabs	moderate	66	21.1109	17	Female	1	0	0	1	1	0	0	0	62.59	99.34	4.3	2.5	1.22	116	34.85	11.65
SN33	Mild_group	nasopharyngeal swabs	moderate	67	20.9572	5	Female	0	0	0	1	0	0	0	0	206.58	26	6.3	4.15	1.56	123	8.75	0.01
SN34	Mild_group	nasopharyngeal swabs	moderate	44	16.1843	9	Female	0	0	0	1	0	0	0	0	4.69	1.77	5.2	4.31	0.41	77	197.19	0.36
SN35	Mild_group	nasopharyngeal swabs	moderate	49	27.1809	8	Male	1	0	0	0	0	0	0	0	1.71	2.21	10.1	6.79	1.88	147	80.99	0.08
SN36	Mild_group	nasopharyngeal swabs	moderate	95	16.8574	7	Female	1	0	0	1	1	1	0	0	2.35	2.96	6.4	4.3	1.32	72	9.94	0.73
SN37	Mild_group	nasopharyngeal swabs	moderate	52	25.4694	6	Male	0	0	0	0	0	0	0	0	0.73	2.76	5.4	3.9	1.11	100	10.93	0.29
SN38	Mild_group	nasopharyngeal swabs	moderate	72	19.7266	4	Female	1	0	0	1	1	0	0	0	56.82	22.41	5.8	4.38	0.94	87	6.28	...
SN39	Mild_group	sputum	moderate	47	23.7332	12	Female	1	0	0	0	0	0	0	0	173.5	122.06	6.6	3.83	1.98	60	0.27	0.03
SN40	Severe_group	nasopharyngeal swabs	severe	66	27.5391	10	Male	1	0	1	1	1	0	1	0	60.93	4.93	6.8	5.72	0.51	133	30.14	0.23
SN41	Mild_group	nasopharyngeal swabs	moderate	80	35.4308	5	Male	1	0	0	1	1	1	0	0	59.79	34.77	6.5	3	2.57	117	1.69	0.04
SN42	Severe_group	nasopharyngeal swabs	severe	85	27.5391	12	Male	0	0	0	1	0	0	0	0	188.84	28.67	4.3	2.42	1.24	70	28.82	0.13
SN43	Severe_group	nasopharyngeal swabs	severe	77	27.5391	5	Male	1	0	0	1	0	0	0	0	160.41	10.94	7.5	6.3	0.89	88	53.5	1.23
SN44	Mild_group	nasopharyngeal swabs	moderate	50	27.5482	7	Male	1	0	0	1	1	0	0	0	188.34	85.2	9.1	4.58	3.77	143	3.47	0.14
SN45	Mild_group	nasopharyngeal swabs	moderate	70	27.7344	14	Female	1	1	0	1	1	0	0	0	50.99	9.81	5.6	3.29	1.52	133	4.59	0.06
SN46	Mild_group	nasopharyngeal swabs	moderate	65	20.8117	10	Female	1	0	0	1	0	0	0	0	71.37	16.3	6.6	3.86	2.04	135	3.72	0.03
SN47	Severe_group	nasopharyngeal swabs	severe	36	17.9163	9	Male	1	0	0	1	0	0	0	0	53.78	0.57	6.1	5	0.39	114	61.56	0.09
SN48	Mild_group	nasopharyngeal swabs	moderate	57	25.8953	4	Female	1	0	0	1	1	0	1	1	88.19	4.39	9	8.09	0.67	42	8.36	0.16
SN49	Severe_group	nasopharyngeal swabs	severe	83	20.2812	30	Male	1	0	0	1	0	0	1	0	198.5	37.51	7.6	6.43	0.52	83	77.16	0.46
SN50	Severe_group	nasopharyngeal swabs	critical	87	13.2118	28	Male	1	0	1	1	0	0	1	1	200.97	30.23	8.4	7.4	0.56	122	51.99	0.69
SN51	Mild_group	nasopharyngeal swabs	moderate	86	16.8574	6	Female	0	0	0	1	0	1	0	0	98.72	2.71	8.1	5.97	1.23	88	1.48	...
SN52	Mild_group	nasopharyngeal swabs	moderate	40	16.937	17	Female	0	1	0	0	0	0	0	0	171.36	18.75	5.4	2.98	1.89	111	0.28	0.04
SN53	Mild_group	nasopharyngeal swabs	moderate	66	25.7812	53	Male	1	0	0	0	0	0	0	0	177.02	32.21	5.1	2.29	2.22	114	2.09	0.06
SN54	Mild_group	nasopharyngeal swabs	moderate	36	18.026	12	Female	1	0	0	0	0	0	0	0	69.42	3.09	3.7	1.51	1.66	108	0.27	0.01
SN55	Mild_group	nasopharyngeal swabs	moderate	85	25.3906	9	Female	0	0	0	1	1	1	0	0	2.21	0.8	8.3	6.53	1.18	162	95.09	...
SN56	Severe_group	nasopharyngeal swabs	severe	80	21.0938	15	Male	1	0	1	1	0	1	0	0	84.91	43.64	16	11.06	3.45	149	10.98	0.06
SN57	Severe_group	nasopharyngeal swabs	severe	56	24.4473	5	Female	1	0	0	0	0	0	0	0	91.95	19.73	4	1.89	1.65	111	0.86	0.02
SN58	Severe_group	nasopharyngeal swabs	severe	73	24.9135	6	Male	1	0	0	1	0	0	0	0	52.66	3.35	6.9	2.75	2.77	114	13.73	0.06
SN59	Mild_group	nasopharyngeal swabs	moderate	57	24.974	6	Female	1	0	0	1	1	0	0	0	60.23	14.47	6	3.65	1.61	108	14.49	0.01
SN60	Mild_group	nasopharyngeal swabs	moderate	71	24.6094	45	Male	1	0	0	1	0	1	0	0	113.44	21.63	8.5	6.02	1.36	136	9.32	0.04
SN61	Severe_group	nasopharyngeal swabs	severe	86	27.5391	6	Male	0	0	0	1	1	1	0	0	76.74	6.92	12.9	8.81	3.2	87	38.97	0.22
SN62	Mild_group	nasopharyngeal swabs	moderate	51	26.1962	21	Male	0	0	0	1	1	0	0	0	114.87	23.09	5.2	3.15	1.46	157	0.99	0.04
SN63	Severe_group	nasopharyngeal swabs	severe	63	21.2306	47	Female	1	0	1	1	1	0	0	0	113.53	25.19	6.1	4.88	0.86	111	79.58	0.06
SN64	Severe_group	nasopharyngeal swabs	severe	75	27.5391	39	Male	1	0	1	1	1	1	0	0	77.96	5.98	8.6	7.63	0.28	136	87.63	0.22
SN65	Mild_group	nasopharyngeal swabs	moderate	100	13.5208	12	Male	0	0	1	1	1	0	0	0	192.93	5.37	6.7	4.79	1.19	83	10.03	0.2
SN66	Mild_group	nasopharyngeal swabs	moderate	58	25.8953	49	Female	1	0	1	1	1	0	1	1	170.52	21.98	9.8	8.37	1.03	94	182.19	0.32
SN67	Mild_group	nasopharyngeal swabs	moderate	54	21.7784	12	Female	1	0	0	1	1	0	0	0	199.08	145.59	4.9	2.76	1.73	126	1.03	0.05
SN68	Severe_group	nasopharyngeal swabs	severe	73	27.3438	61	Male	1	1	1	1	1	0	0	0	82.38	12.95	6.4	5.36	0.5	117	86.47	0.12
SN69	Severe_group	nasopharyngeal swabs	severe	67	22.4913	52	Male	1	0	1	1	1	0	1	0	149.98	98.17	10.6	8.51	1.1	167	118.29	0.1

## Sheet: S2
Supplementary Table S2：Relative abundance of bacterial microbiome among each samples at different levels
S2.1 At the phylum level													S2.4 At the family level
	Actinobacteria	Bacteroidetes	Candidatus_Saccharibacteria	Cyanobacteria	Firmicutes	Fusobacteria	Others	Proteobacteria	Spirochaetes	Synergistetes	Tenericutes			Actinomycetaceae	Corynebacteriaceae	Enterobacteriaceae	Enterococcaceae	Micrococcaceae	Moraxellaceae	Others	Prevotellaceae	Staphylococcaceae	Streptococcaceae	Veillonellaceae
SN01	0.0428512	0.260373	0.00761985	0	0.430396	0.0777894	0.000544275	0.152523	0.0268579	0.00104668	0		SN01	0.0180239	0.000125602	0	0	0.0235085	0.00257484	0.448336	0.231379	0	0.226146	0.0499058
SN02	0.103538	0.214026	0	0	0.658698	0	0	0.0237387	0	0	0		SN02	0.00812225	0	0.0087712	0.000523341	0.0951225	0	0.0432489	0.214026	0	0.324367	0.30582
SN03	0.0702533	0.10067	2.09336e-05	0	0.379129	0.00290978	0	0.441658	0.00519154	0.000167469	0		SN03	0.0488591	0	2.09336e-05	0	0.0124765	0.042914	0.470295	0.10046	0	0.0935943	0.231379
SN04	0.389638	0.0578815	4.18673e-05	6.28009e-05	0.481495	0.0272137	0	0.042914	0.000314005	0.000439606	0		SN04	0.287168	0.00383086	0	0	0.0956039	0	0.131233	0.0363617	2.09336e-05	0.407411	0.0383714
SN05	0	0.00152816	0	0	0.00284698	0	0	0.995625	0	0	0		SN05	0	0	0.848734	0	0	0.146891	0.00280511	0.00152816	0	0	4.18673e-05
SN06	0.0209336	0.0176471	0.000816412	0	0.041323	0.00276324	0	0.915847	0.000314005	0.000125602	0.00023027		SN06	0.0045426	0.00496127	0.157944	0.00102575	0	0.749215	0.0326146	0.0172912	0	0.0115763	0.020829
SN07	0.195332	0.111932	0	0	0.482751	0.000293071	0	0.209692	0	0	0		SN07	0.143626	6.28009e-05	0.000272137	0	0.047017	0.00182123	0.370044	0.110655	0	0.183044	0.143458
SN08	0.411346	0.0970274	0.00318191	8.37346e-05	0.423278	0.0292234	0.000565208	0.0304794	0.00481474	0	0		SN08	0.313293	0.00152816	0.000146535	4.18673e-05	0.0815365	0.00349592	0.164204	0.0900775	8.37346e-05	0.21279	0.132803
SN09	0.230898	0.10044	0.000983881	0	0.585577	0.00422859	0	0.0772033	0.000628009	0	4.18673e-05		SN09	0.149383	0.000188403	8.37346e-05	0	0.0767218	0	0.211493	0.0614821	0	0.377078	0.123571
SN10	0.12826	0.0415742	0.000418673	0.000167469	0.598283	0.0855767	0.000355872	0.139292	0.00175843	0.000167469	0.00414486		SN10	0.118045	0.00680343	0.00617542	0	0.000795478	0.00092108	0.336152	0.0019887	0.43117	0.0813272	0.0166213
SN11	0.988256	0.00133975	0.000418673	0	0.00617542	0.000293071	0.000732677	0.00278417	0	0	0		SN11	0.00169563	0.984216	0	2.09336e-05	0.000272137	8.37346e-05	0.00847812	0.000837346	0.00404019	0.000125602	0.00023027
SN12	0.0143814	0.00487754	4.18673e-05	0.00207243	0.95246	0.00232363	0.000146535	0.0236759	0	0	2.09336e-05		SN12	0.00548461	0.0047938	0.000669876	0	0.000962947	0.0025539	0.0419091	0.00265857	0.932991	0.00531714	0.00265857
SN13	0.0773289	0.142432	0.00299351	0	0.433096	0.0603726	0.000104668	0.281243	0.0021771	0.000209336	4.18673e-05		SN13	0.0169772	0.0022399	0.00108855	0	0.0546159	0.00228177	0.451329	0.0954155	0.00514968	0.267783	0.103119
SN14	0.0677203	0.000188403	6.28009e-05	0.000293071	0.865041	2.09336e-05	4.18673e-05	0.0666318	0	0	0		SN14	0.000146535	0.067511	0.0638685	0.271551	2.09336e-05	0.000565208	0.00366339	6.28009e-05	0.592317	0.000209336	8.37346e-05
SN15	0.0515596	0.0597865	0.0187356	0.000523341	0.139627	0.000481474	0	0.729286	0	0	0		SN15	0.0411555	0.00144442	0.000816412	6.28009e-05	0.00422859	0.00259577	0.811534	0.0320494	0	0.0146535	0.0914591
SN16	0.201319	0.454679	0.00351685	0	0.274545	0.0287209	0.000397739	0.0229851	0.00611262	0.00753611	0.000188403		SN16	0.130584	0.0277789	0.000607076	0	0.0375131	4.18673e-05	0.203475	0.399184	0.00368432	0.123718	0.0734143
SN17	0.833954	0.039753	0.00190496	0	0.116935	0.00483567	6.28009e-05	0.00247017	0	8.37346e-05	0		SN17	0.720431	0.0152188	4.18673e-05	0	0.0814528	0	0.0846766	0.0366548	0	0.00648943	0.0550345
SN18	0.978355	0.00175843	0.00046054	0.000376805	0.00247017	0.00023027	0.00732677	0.00866653	0	0.000355872	0		SN18	0.000837346	0.963889	0.000314005	0.000544275	0.00226083	0.000648943	0.0305422	0.000481474	0.000188403	0.00023027	6.28009e-05
SN19	0.0423906	0.0415951	0	0	0.813314	0.0536739	0	0.0448399	0	0	0.00418673		SN19	0.0405275	0.000146535	6.28009e-05	0.000146535	0.000146535	0	0.131882	0.0362989	0.0311911	0.700837	0.0587607
SN20	0.109378	0.131191	0	8.37346e-05	0.719426	0	0	0.0399205	0	0	0		SN20	0.109315	0	2.09336e-05	0.00774545	6.28009e-05	0	0.0401089	0.131191	0.00267951	0.000481474	0.708394
SN21	0.205275	0.372849	0.00422859	0	0.402784	0.00496127	0.000188403	0.00931547	0.000314005	4.18673e-05	4.18673e-05		SN21	0.156877	0.000753611	0	0	0.0136487	2.09336e-05	0.0928198	0.372305	0	0.187796	0.17578
SN22	0.305882	0.0599121	0.0153025	0	0.559389	0.0201382	2.09336e-05	0.0348545	0.00337032	0.00113042	0		SN22	0.242349	0.00527528	0	0	0.0547415	0.000104668	0.170839	0.0503873	2.09336e-05	0.374754	0.101528
SN23	0.797111	0.114549	0.00173749	0	0.0835671	0.00138162	4.18673e-05	0.00123508	2.09336e-05	0.000355872	0		SN23	0.766443	2.09336e-05	4.18673e-05	0	0.00939921	0	0.053297	0.11413	0	0.011367	0.0453004
SN24	0.00766171	0.00427046	0.000209336	0.00023027	0.979485	0.000188403	6.28009e-05	0.00780825	8.37346e-05	0	0		SN24	0.00316098	0.00282604	0.00092108	0	0.000795478	0.00161189	0.0275905	0.00355872	0.956332	0.00171656	0.00148629
SN25	0.339585	0.303245	0.00510781	0	0.324848	0.0193846	4.18673e-05	0.00644756	0.00125602	6.28009e-05	2.09336e-05		SN25	0.307808	0.000962947	0.000376805	0	0.0209127	0	0.0771195	0.300733	0.000376805	0.148859	0.142851
SN26	0.584028	0.000125602	0	0.000962947	0.391543	0.000418673	0	0.0229223	0	0	0		SN26	0.448796	0.00628009	4.18673e-05	0	0.126209	0	0.0419091	0.000104668	0.000167469	0.294201	0.0822901
SN27	0.234938	0.0781034	0.00290978	0	0.664329	0.00648943	8.37346e-05	0.00822692	0.00303538	0.00180029	8.37346e-05		SN27	0.173435	0.00136069	0.000146535	2.09336e-05	0.0566674	0	0.0639941	0.0712581	0	0.596379	0.0367385
SN28	0.40291	0.149257	0.00244924	0.00297258	0.226669	0.0202638	0.000376805	0.188047	0.00686623	0.000188403	0		SN28	0.078229	0.00464727	0.000104668	0	0.314172	0.00150722	0.316056	0.144924	8.37346e-05	0.117856	0.0224199
SN29	0.366569	0.311555	0.0019887	0.000837346	0.274524	0.0289512	0.000209336	0.0112414	0.00322378	0.000900146	0		SN29	0.166087	0.0254553	0	0	0.151413	0.000104668	0.214465	0.303915	0.000125602	0.0321959	0.106238
SN30	0.149173	0.00937827	4.18673e-05	0	0.0106762	0	0	0.828093	0	0.000104668	0.00253297		SN30	0.00104668	0.147478	0.663345	2.09336e-05	0	0.160708	0.0138581	0.00328658	0.000565208	8.37346e-05	0.00960854
SN31	0.0309818	0.713146	0	0	0.00456353	0.000209336	0	0.251015	0	0	8.37346e-05		SN31	0.0305003	0.000481474	0.171614	0	0	0.000648943	0.792192	0.000251204	0	2.09336e-05	0.0042914
SN32	0.574733	0.0682437	0.00232363	2.09336e-05	0.143291	0.0765962	0.000544275	0.133787	0.000439606	2.09336e-05	0		SN32	0.25292	0.305673	0	0	0.015784	0	0.292422	0.0363408	0.00188403	0.0522922	0.0426837
SN33	0.188256	0.0834206	4.18673e-05	0	0.324388	0.127318	4.18673e-05	0.267239	0.0092736	2.09336e-05	0		SN33	0.0435001	0	0	0	0.144651	0.000146535	0.543186	0.0505757	0.00207243	0.174314	0.0415533
SN34	0.101905	0.161775	0	0	0.694767	4.18673e-05	0	0.0415114	0	0	0		SN34	0.0720955	0.00023027	2.09336e-05	0	0.00967134	0.000732677	0.0959598	0.156709	0.00133975	0.224806	0.438434
SN35	0.264036	0.218275	0.00487754	0	0.464162	0.040046	2.09336e-05	0.00529621	0.0026167	0.000648943	2.09336e-05		SN35	0.183735	0.00119322	0	0	0.0524806	0	0.199644	0.209839	0	0.184991	0.168118
SN36	0.115658	0.0267741	0.000502407	0	0.852271	0.00370525	0	0.000942014	4.18673e-05	0.000104668	0		SN36	0.00724304	0.0838183	6.28009e-05	0.00542181	0.022085	6.28009e-05	0.0209127	0.0256856	0.530772	0.261231	0.0427046
SN37	0.111534	0.387838	0.0232573	0	0.351727	0.110509	0.00069081	0.0134603	0.00092108	6.28009e-05	0		SN37	0.107222	0.00023027	0	0	0.00196776	0	0.204145	0.376994	0.000565208	0.0454469	0.263429
SN38	0.0277371	0.00046054	0.000167469	0.00163282	0.9565	2.09336e-05	0.000104668	0.013251	0	8.37346e-05	4.18673e-05		SN38	0.000418673	0.0262717	0.00841532	0.000481474	0.000125602	0.000502407	0.0267113	0.000146535	0.933682	0.00144442	0.00180029
SN39	0.126963	0.187084	0.00138162	4.18673e-05	0.432259	0.073184	0	0.164622	0.00200963	0.0123509	0.000104668		SN39	0.0182123	0.00270044	4.18673e-05	0	0.099058	8.37346e-05	0.371342	0.164685	0.000544275	0.155746	0.187586
SN40	0.00332845	0.00142349	0	0	0.0444003	0.00117228	0	0.949676	0	0	0		SN40	0.00157002	8.37346e-05	0	0.000858279	0.00165376	0.949194	0.0147582	0.00092108	0.0203475	0.000628009	0.00998535
SN41	0.116014	0.0962738	0.00464727	0	0.684593	0.0243458	0.000188403	0.0615449	0.0069081	0.00489847	0.000586142		SN41	0.0471426	0.00818505	0	0	0.0565208	0	0.189784	0.0707766	2.09336e-05	0.488361	0.139209
SN42	0.433222	0.00267951	0	0	0.557212	0	0	0.0068453	4.18673e-05	0	0		SN42	0.000376805	0.419887	0	0	0.00542181	2.09336e-05	0.0181913	6.28009e-05	0.00297258	0.509085	0.0439816
SN43	0.824409	0.0218547	0.000167469	0	0.122148	0.000251204	0	0.0311074	6.28009e-05	0	0		SN43	0.00688717	0.78924	0.0247645	0	0.000753611	0	0.149822	0.0218338	2.09336e-05	0.00404019	0.00263764
SN44	0.60896	0.088026	0.0117228	2.09336e-05	0.256563	0.0114088	2.09336e-05	0.0230689	0.000146535	6.28009e-05	0		SN44	0.55516	0.00121415	6.28009e-05	0	0.0479799	0	0.112937	0.083274	0	0.165062	0.0343102
SN45	0.189282	0.175947	0	0	0.545635	0.0247436	4.18673e-05	0.0622357	0.000711744	0.00121415	0.000188403		SN45	0.0273812	0.00257484	4.18673e-05	0	0.149717	0	0.351978	0.0574	2.09336e-05	0.32309	0.0877957
SN46	0.199267	0.0465773	0.000648943	6.28009e-05	0.686268	0.040381	0	0.024304	0.0024911	0	0		SN46	0.123843	0.00475194	0.00171656	0	0.0683065	0	0.132698	0.0354197	8.37346e-05	0.583965	0.049215
SN47	0.0827507	0.247394	0	0	0.628156	0.0257065	0	0.0159933	0	0	0		SN47	0.0361943	0.0417626	0.000146535	0.00129789	0	0	0.379799	0.214947	0.000209336	0.28947	0.0361733
SN48	0.00609169	0.101214	0	4.18673e-05	0.891585	0	0.000523341	0.000544275	0	0	0		SN48	0	0.00272137	0	0.880155	0	0	0.1121	0	2.09336e-05	0.00489847	0.000104668
SN49	0.750618	0.000125602	0.000104668	0	0.247896	2.09336e-05	0	0.000167469	0	0.000146535	0.00092108		SN49	0	0.750618	2.09336e-05	0.242977	0	0	0.0049194	6.28009e-05	0.00110948	0	0.000293071
SN50	0.0020515	0	0	0	0.64551	0	0	0.352439	0	0	0		SN50	2.09336e-05	0.00203056	0.351832	0.645091	0	0.000607076	0.000376805	0	4.18673e-05	0	0
SN51	0.039418	0.0985765	0	2.09336e-05	0.857944	2.09336e-05	0	0.00378899	0.00023027	0	0		SN51	0.00100482	0	2.09336e-05	0.00152816	0.000209336	4.18673e-05	0.211597	0.0972577	0.243437	0.398074	0.0468285
SN52	0.19776	0.395688	0.0164957	0.000334938	0.300167	0.0697928	0.000628009	0.0151769	0.00330752	0.000586142	6.28009e-05		SN52	0.169751	8.37346e-05	0.000272137	0.000146535	0.0251622	0	0.224011	0.3556	0	0.0777894	0.147184
SN53	0.340193	0.362005	0.0109064	4.18673e-05	0.243123	0.0279045	2.09336e-05	0.0157421	6.28009e-05	0	0		SN53	0.280762	0.00282604	4.18673e-05	2.09336e-05	0.0472263	0	0.120347	0.354051	0	0.127611	0.0671132
SN54	0.412791	0.22131	0.00613356	4.18673e-05	0.30808	0.0418045	0	0.00962947	0.000188403	2.09336e-05	0		SN54	0.118045	0.000355872	0	0	0.29215	0	0.162864	0.19753	0.000607076	0.0510781	0.177371
SN55	4.18673e-05	0.000125602	0	4.18673e-05	0.999079	0	0	0.000711744	0	0	0		SN55	0	0	0.000334938	6.28009e-05	2.09336e-05	0	0.0570651	4.18673e-05	0	0.922148	0.0203266
SN56	0.00757798	0.000146535	0	8.37346e-05	0.991208	0	0	0.000711744	0	0	0.000272137		SN56	0.000355872	2.09336e-05	0.000355872	0	0	2.09336e-05	0.9713	2.09336e-05	0.0138999	0.0140255	0
SN57	0.434687	0.281013	0.0185681	4.18673e-05	0.240695	0.00822692	0	0.0167678	0	0	0		SN57	0.368139	0.0132091	0	0	0.0023655	0	0.15045	0.280888	0.00906427	0.0192171	0.156667
SN58	0.443751	0.000879213	0	4.18673e-05	0.288759	6.28009e-05	2.09336e-05	0.266485	0	0	0		SN58	0.263827	0.000188403	0.000104668	0	0.17938	6.28009e-05	0.312518	0.000879213	0.000669876	0.242265	0.000104668
SN59	0.269102	0.347436	0.000439606	2.09336e-05	0.322336	0.0155956	0	0.0444421	0.000502407	0.000104668	2.09336e-05		SN59	0.198849	0.000565208	0.000586142	0	0.0654804	0	0.254134	0.342621	0	0.0966087	0.0411555
SN60	0.656479	6.28009e-05	0	0.00148629	0.00295164	0	0	0.33902	0	0	0		SN60	0	0.656312	0.338706	0	0	0	0.00424953	4.18673e-05	0.000648943	2.09336e-05	2.09336e-05
SN61	0.718045	0.000167469	0	0	0.279401	4.18673e-05	0	0.00213523	2.09336e-05	0.000188403	0		SN61	0.000167469	0.71771	0.00169563	0.000648943	0	0	0.000983881	0.000146535	0.0256437	0.252899	0.000104668
SN62	0.118987	0.151748	0.0191334	0.00247017	0.49014	0.00410299	0	0.206782	0.00657316	0	6.28009e-05		SN62	0.0424953	0.0560603	0.00512874	0	0.00232363	0.0702114	0.254406	0.128512	0.0955621	0.21748	0.127821
SN63	0.780678	0.011681	0.00115135	0.0103831	0.0371572	0.000376805	6.28009e-05	0.15851	0	0	0		SN63	0.00462633	0.761566	0.000314005	0.000502407	0.0117856	0.0897634	0.111367	0.00320285	0.0114507	0.00496127	0.00046054
SN64	0.930689	0.00416579	8.37346e-05	0.0022399	0.0442118	2.09336e-05	0	0.0185891	0	0	0		SN64	0.00410299	0.925267	0.00347498	0	0.000167469	0.00529621	0.0179401	0.000355872	0.0420348	0.000293071	0.00106762
SN65	0.964015	0.0021771	0	0.000125602	0.0142977	4.18673e-05	8.37346e-05	0.0192589	0	0	0		SN65	0.000125602	0.963554	0.00115135	0.00510781	0	0.00579862	0.015156	0.000188403	0.00868746	0	0.00023027
SN66	0.00196776	0	0	0	0.000502407	0	0	0.99753	0	0	0		SN66	0	0.00196776	0.995897	0.000209336	0	0.00161189	8.37346e-05	0	0	0.00023027	0
SN67	0.857274	0.0023027	0.000104668	4.18673e-05	0.093385	0	2.09336e-05	0.0457609	0.000104668	0.00100482	0		SN67	0.00121415	0.854867	0.0295583	0.0848231	0.000732677	0.0147373	0.00785011	0.00167469	0.000648943	4.18673e-05	0.00385179
SN68	0.0220431	0.118547	0.00944107	0.000104668	0.344631	0.00127695	0.00188403	0.502072	0	0	0		SN68	0.00755704	0.00324471	0.0023655	0	0.00272137	0.142098	0.502638	0.0106343	0.288947	0.0202638	0.0195311
SN69	0.403559	0.01009	0.000272137	2.09336e-05	0.286582	0.000334938	6.28009e-05	0.299037	0	0	4.18673e-05		SN69	0.000983881	0.401193	0.000879213	0	0.000607076	0.274921	0.0340172	0.00259577	0.279653	0.00140255	0.00374712
S2.2 At the class level													S2.5 At the genus level
	Actinobacteria	Bacilli	Bacteroidia	Betaproteobacteria	Clostridia	Epsilonproteobacteria	Flavobacteriia	Fusobacteriia	Gammaproteobacteria	Negativicutes	Others		sample	Acinetobacter	Actinomyces	Corynebacterium	Enterococcus	Klebsiella	Others	Prevotella	Rothia	Staphylococcus	Streptococcus	Veillonella
SN01	0.0428512	0.30157	0.256898	0.116579	0.0769102	0.00406113	0.00303538	0.0777894	0.0297258	0.0499058	0.0406741		SN01	0.00257	0.0146	0.000126	0	0	0.468139	0.222	0.0235	0	0.226	0.0433
SN02	0.103538	0.352878	0.214026	0.0142767	0	0.00069081	0	0	0.0087712	0.30582	0		SN02	0	0.00812	0	0.000523	0.00421	0.048252	0.214	0.0951	0	0.324	0.306
SN03	0.0702533	0.103496	0.10046	0.000125602	0.0369897	0.000481474	0.000209336	0.00290978	0.441009	0.231379	0.0126858		SN03	0.0429	0.0481	0	0	0	0.521729	0.0805	0.0125	0	0.0936	0.201
SN04	0.389638	0.42175	0.0401089	0.0402554	0.0168097	0.0022399	0.0177727	0.0272137	0.000334938	0.0383714	0.00550555		SN04	0	0.287	0.00383	0	0	0.134855	0.0357	0.0956	2.09e-05	0.407	0.0355
SN05	0	0.00280511	0.00152816	0	0	0	0	0	0.995625	4.18673e-05	0		SN05	0.147	0	0	0	0.659	0.193008	0.00151	0	0	0	4.19e-05
SN06	0.0209336	0.0127277	0.0176471	0.000439606	0.00730584	0.00820599	0	0.00276324	0.907201	0.020829	0.00194683		SN06	0.749	0.00454	0.00496	0.00103	0.109	0.0972158	0.0128	0	0	0.0116	0.00925
SN07	0.195332	0.332615	0.110718	0.2027	0.00540088	0.004731	0.00121415	0.000293071	0.00226083	0.143458	0.00127695		SN07	0.00182	0.144	6.28e-05	0	0.000167	0.416203	0.0773	0.047	0	0.183	0.131
SN08	0.411346	0.239983	0.0913544	0.00979694	0.0504919	0.0118694	0.00437513	0.0292234	0.00498221	0.132803	0.0137743		SN08	0.00245	0.309	0.00153	4.19e-05	0	0.182667	0.0879	0.0813	8.37e-05	0.213	0.122
SN09	0.230898	0.414549	0.0912707	0.0305212	0.0467658	0.00154909	0.009148	0.00422859	0.0451329	0.123571	0.0023655		SN09	0	0.149	0.000188	0	2.09e-05	0.26659	0.0578	0.0767	0	0.377	0.0728
SN10	0.12826	0.542935	0.00265857	0.0277999	0.0375759	0.101151	0.0384132	0.0855767	0.00772451	0.0166213	0.0112832		SN10	0.000816	0.115	0.0068	0	0	0.346535	0.00176	0.000586	0.431	0.0813	0.0158
SN11	0.988256	0.0042914	0.000837346	0.00100482	0.00165376	2.09336e-05	0	0.000293071	0.000209336	0.00023027	0.00320285		SN11	0	0.000712	0.984	2.09e-05	0	0.00958761	0.000837	0.00023	0.00404	0.000126	0.00023
SN12	0.0143814	0.947101	0.00267951	0.0122462	0.00270044	0.000146535	0.00144442	0.00232363	0.00391459	0.00265857	0.010404		SN12	0.00255	0.00548	0.00479	0	0.000356	0.0430396	0.00214	0.000816	0.933	0.00532	0.00251
SN13	0.0773289	0.302512	0.1287	0.203308	0.0262298	0.00778731	0.0131045	0.0603726	0.0699812	0.103119	0.00755704		SN13	0.00228	0.017	0.00224	0	0.000942	0.484132	0.0682	0.0546	0.00515	0.268	0.0976
SN14	0.0677203	0.864873	6.28009e-05	0.000795478	8.37346e-05	0	2.09336e-05	2.09336e-05	0.0646222	8.37346e-05	0.00171656		SN14	0.000565	0.000147	0.0675	0.272	0.000293	0.0672389	6.28e-05	2.09e-05	0.592	0.000209	8.37e-05
SN15	0.0515596	0.0352313	0.0534017	0.0213732	0.0110739	0.0134603	0.00399832	0.000481474	0.693364	0.0914591	0.024597		SN15	0.00255	0.0409	0.00144	6.28e-05	0.000712	0.87019	0.027	0.00398	0	0.0147	0.0385
SN16	0.201319	0.15717	0.449089	0.00992255	0.0415533	0.0023027	0.00349592	0.0287209	0.0106343	0.0734143	0.0223781		SN16	0	0.13	0.0278	0	0.00044	0.222273	0.396	0.0375	0.00368	0.124	0.0584
SN17	0.833954	0.00751518	0.0392296	6.28009e-05	0.0519573	0.0023027	0.000523341	0.00483567	8.37346e-05	0.0550345	0.00450073		SN17	0	0.72	0.0152	0	4.19e-05	0.136592	0.0365	0.0815	0	0.00649	0.00383
SN18	0.978355	0.00161189	0.000502407	0.00370525	0.000795478	8.37346e-05	0.000104668	0.00023027	0.00146535	6.28009e-05	0.0130835		SN18	0.000649	0.000837	0.964	0.000544	0.000209	0.0330752	0.000481	2.09e-05	0	0.00023	6.28e-05
SN19	0.0423906	0.735336	0.0362989	0.0190078	0.0192171	0.0257484	0.00529621	0.0536739	8.37346e-05	0.0587607	0.00418673		SN19	0	0.0404	0.000147	0.000147	0	0.132238	0.0363	0.000147	0.0312	0.701	0.0586
SN20	0.109378	0.0109274	0.131191	0.0244505	0.000104668	0.0154281	0	0	2.09336e-05	0.708394	0.000104668		SN20	0	0.109	0	0.00775	0	0.0401298	0.131	6.28e-05	0.00268	0.000481	0.708
SN21	0.205275	0.198639	0.372702	0.00140255	0.0244714	0.00481474	8.37346e-05	0.00496127	0.00309818	0.17578	0.0087712		SN21	2.09e-05	0.157	0.000754	0	0	0.125204	0.365	0.0136	0	0.188	0.15
SN22	0.305882	0.398242	0.0555788	0.0207871	0.0544903	0.00565208	0.00433326	0.0201382	0.00837346	0.101528	0.0249948		SN22	0.000105	0.241	0.00528	0	0	0.20023	0.0408	0.0547	2.09e-05	0.375	0.0826
SN23	0.797111	0.0123299	0.114298	0.00023027	0.0220013	0.000942014	0.000251204	0.00138162	6.28009e-05	0.0453004	0.00609169		SN23	0	0.76	2.09e-05	0	2.09e-05	0.0737701	0.112	0.0094	0	0.0114	0.033
SN24	0.00766171	0.9583	0.00357965	0.00303538	0.0196567	0	0.000167469	0.000188403	0.00347498	0.00148629	0.00244924		SN24	0.00117	0.00314	0.00283	0	0.000502	0.0289512	0.00335	0.000565	0.956	0.00172	0.00144
SN25	0.339585	0.154511	0.302156	0.00288884	0.0240109	0.00150722	0.000837346	0.0193846	0.00194683	0.142851	0.0103203		SN25	0	0.307	0.000963	0	0.000272	0.106071	0.284	0.0209	0.000377	0.149	0.132
SN26	0.584028	0.309211	0.000104668	0.0200754	4.18673e-05	0	2.09336e-05	0.000418673	0.00278417	0.0822901	0.00102575		SN26	0	0.449	0.00628	0	4.19e-05	0.0419719	0.000105	0.126	0.000167	0.294	0.0823
SN27	0.234938	0.602386	0.0776638	0.00450073	0.0230898	0.00136069	0.000439606	0.00648943	0.0023027	0.0367385	0.01009		SN27	0	0.173	0.00136	2.09e-05	0.000126	0.0700858	0.0703	0.0567	0	0.596	0.0321
SN28	0.40291	0.179736	0.145007	0.170944	0.0229642	0.00445887	0.00332845	0.0202638	0.00975508	0.0224199	0.0182123		SN28	0.00151	0.0634	0.00465	0	0	0.396546	0.0934	0.314	8.37e-05	0.118	0.00865
SN29	0.366569	0.0541344	0.309483	0.0024911	0.10965	0.00634289	0.00200963	0.0289512	0.00177936	0.106238	0.0123508		SN29	0.000105	0.149	0.0255	0	0	0.281243	0.299	0.151	0.000126	0.0322	0.0622
SN30	0.149173	0.00069081	0.00328658	0.000334938	0.000376805	0.000251204	0.00609169	0	0.827507	0.00960854	0.00267951		SN30	0.161	0.00105	0.147	2.09e-05	0.518	0.160331	0.00329	0	0.000565	8.37e-05	0.00862
SN31	0.0309818	0.000167469	0.000272137	0.00837346	0.000104668	0.00546368	0.712853	0.000209336	0.237115	0.0042914	0.000167469		SN31	0.000649	0.0305	0.000481	0	0.101	0.862822	0.00023	0	0	2.09e-05	0.00429
SN32	0.574733	0.0676366	0.0444421	0.125937	0.0325099	0.00416579	0.0235922	0.0765962	0.00362152	0.0426837	0.00408206		SN32	0	0.253	0.306	0	0	0.309839	0.0334	0.0158	0.00188	0.0523	0.0283
SN33	0.188256	0.25359	0.0780615	0.215219	0.0284488	0.00452167	0.00535901	0.127318	0.0474566	0.0415533	0.0102156		SN33	2.09e-05	0.0358	0	0	0	0.560687	0.0472	0.145	0.00207	0.174	0.0353
SN34	0.101905	0.255286	0.156709	0.0395855	0.000858279	0.00110948	0.00506594	4.18673e-05	0.000795478	0.438434	0.000209336		SN34	0.000733	0.0721	0.00023	0	2.09e-05	0.113858	0.153	0.00967	0.00134	0.225	0.424
SN35	0.264036	0.214947	0.217563	0.000607076	0.0789826	0.00284697	0.000711744	0.040046	0.00119322	0.168118	0.0109483		SN35	0	0.184	0.00119	0	0	0.206887	0.206	0.0525	0	0.185	0.165
SN36	0.115658	0.8009	0.0266485	0.000188403	0.00837346	0.000418673	0.000125602	0.00370525	0.000293071	0.0427046	0.000983881		SN36	6.28e-05	0.00714	0.0838	0.00542	6.28e-05	0.0225874	0.0251	0.0221	0.531	0.261	0.0417
SN37	0.111534	0.0682437	0.386707	0.00523341	0.0188821	0.00165376	0.00108855	0.110509	0.00657316	0.263429	0.0261461		SN37	0	0.107	0.00023	0	0	0.275089	0.338	0.00197	0.000565	0.0454	0.231
SN38	0.0277371	0.93609	0.000146535	0.0021771	0.0175005	0	0.000125602	2.09336e-05	0.00977601	0.0024283	0.00399833		SN38	0.000502	0.000419	0.0263	0.000481	0.00469	0.0308981	0.000126	8.37e-05	0.934	0.00144	0.00142
SN39	0.126963	0.192234	0.18564	0.142914	0.0474566	0.00200963	0.00144442	0.073184	0.0180867	0.187586	0.0224827		SN39	6.28e-05	0.0173	0.0027	0	4.19e-05	0.409525	0.162	0.0991	0.000544	0.156	0.153
SN40	0.00332845	0.034394	0.00092108	0.000481474	2.09336e-05	0	0.000502407	0.00117228	0.949194	0.00998535	0		SN40	0.949	0.00157	8.37e-05	0.000858	0	0.0147791	0.000921	0.00165	0.0203	0.000628	0.00996
SN41	0.116014	0.525539	0.093699	0.056479	0.0196567	0.00253297	0.00251204	0.0243458	0.00244924	0.139209	0.0175633		SN41	0	0.046	0.00819	0	0	0.202428	0.0688	0.0565	2.09e-05	0.488	0.13
SN42	0.433222	0.512435	0.00192589	0.00535901	0.000795478	0.000962947	0.000753611	0	2.09336e-05	0.0439816	0.000544275		SN42	2.09e-05	0.000377	0.42	0	0	0.0181913	6.28e-05	0.00542	0.00297	0.509	0.044
SN43	0.824409	0.00427046	0.0218338	0.000146535	0.11524	0.000397739	2.09336e-05	0.000251204	0.0305631	0.00263764	0.00023027		SN43	0	0.00674	0.789	0	0.0105	0.166925	0.0216	0.000754	2.09e-05	0.00404	0.000167
SN44	0.60896	0.171112	0.0869374	0.0151978	0.0494034	0.00437513	0.00102575	0.0114088	0.00347498	0.0343102	0.0137953		SN44	0	0.542	0.00121	0	4.19e-05	0.144023	0.081	0.048	0	0.165	0.0185
SN45	0.189282	0.424304	0.17017	0.0512246	0.0334938	0.00732677	0.00577769	0.0247436	0.00364245	0.0877957	0.0022399		SN45	0	0.0268	0.00257	0	0	0.370672	0.0513	0.15	2.09e-05	0.323	0.0759
SN46	0.199267	0.599267	0.0441909	0.0155118	0.0372619	0.00144442	0.00238644	0.040381	0.00722211	0.049215	0.00385179		SN46	0	0.118	0.00475	0	0.00172	0.146891	0.035	0.0683	8.37e-05	0.584	0.041
SN47	0.0827507	0.291061	0.247394	4.18673e-05	0.297279	0.00129789	0	0.0257065	0.00556835	0.0382667	0.0106343		SN47	0	0.0362	0.0418	0.0013	0	0.413607	0.215	0	0.000209	0.289	0.00251
SN48	0.00609169	0.888047	0.101214	0.000481474	0.00280511	0	0	0	0	0.000104668	0.00125602		SN48	0	0	0.00272	0.88	0	0.112142	0	0	2.09e-05	0.0049	6.28e-05
SN49	0.750618	0.244463	0.000125602	4.18673e-05	0.000104668	2.09336e-05	0	2.09336e-05	2.09336e-05	0.000293071	0.0042914		SN49	0	0	0.751	0.243	0	0.00496127	6.28e-05	0	0.00111	0	0.000272
SN50	0.0020515	0.64551	0	0	0	0	0	0	0.352439	0	0		SN50	0.000607	2.09e-05	0.00203	0.645	0.282	0.069709	0	0	4.19e-05	0	0
SN51	0.039418	0.799498	0.0985347	0.000502407	0.0116182	0.00318191	4.18673e-05	2.09336e-05	6.28009e-05	0.0468285	0.000293071		SN51	4.19e-05	0.001	0	0.00153	2.09e-05	0.213251	0.0972	0.000209	0.243	0.398	0.0452
SN52	0.19776	0.123885	0.387733	0.00177936	0.0252878	0.00483567	0.00776638	0.0697928	0.00854092	0.147184	0.0254344		SN52	0	0.169	8.37e-05	0.000147	0.000188	0.254072	0.329	0.0252	0	0.0778	0.144
SN53	0.340193	0.136634	0.35717	0.00764078	0.0351057	0.00468913	0.0047938	0.0279045	0.00341218	0.0671132	0.0153444		SN53	0	0.28	0.00283	2.09e-05	0	0.152774	0.333	0.0472	0	0.128	0.0562
SN54	0.412791	0.114193	0.220243	0.00741051	0.0143605	0.00221897	0.000962947	0.0418045	0	0.177371	0.00864559		SN54	0	0.117	0.000356	0	0	0.179736	0.188	0.292	0.000607	0.0511	0.17
SN55	4.18673e-05	0.978522	0.000104668	0.000167469	0.00023027	0.000104668	2.09336e-05	0	0.000355872	0.0203266	0.000125602		SN55	0	0	0	6.28e-05	0.000272	0.0571488	4.19e-05	2.09e-05	0	0.922	0.0203
SN56	0.00757798	0.991208	8.37346e-05	0.000125602	0	0.000125602	0	0	0.000376805	0	0.000502407		SN56	2.09e-05	0.000356	2.09e-05	0	0	0.971656	2.09e-05	0	0.0139	0.014	0
SN57	0.434687	0.0288256	0.28095	0.000251204	0.0527737	0.0157212	6.28009e-05	0.00822692	0.000669876	0.156667	0.0211639		SN57	0	0.368	0.0132	0	0	0.233912	0.263	0.00234	0.00906	0.0192	0.0914
SN58	0.443751	0.2879	0.000879213	0.243102	0.000732677	0.000209336	0	6.28009e-05	0.0230898	0.000104668	0.000167469		SN58	4.19e-05	0.264	0.000188	0	0	0.312686	0.000879	0.179	0.00067	0.242	6.28e-05
SN59	0.269102	0.104626	0.34394	0.0043542	0.170128	0.0393762	0.000983881	0.0155956	0.000586142	0.0411555	0.0101528		SN59	0	0.198	0.000565	0	0.00044	0.273435	0.331	0.0655	0	0.0966	0.0345
SN60	0.656479	0.0024283	4.18673e-05	0	0.000502407	0	2.09336e-05	0	0.338748	2.09336e-05	0.00175843		SN60	0	0	0.656	0	2.09e-05	0.342935	4.19e-05	0	0.000649	2.09e-05	2.09e-05
SN61	0.718045	0.279213	0.000146535	8.37346e-05	8.37346e-05	0.000355872	2.09336e-05	4.18673e-05	0.00169563	0.000104668	0.000209336		SN61	0	0.000167	0.718	0.000649	0.00117	0.00152816	0.000147	0	0.0256	0.253	8.37e-05
SN62	0.118987	0.324011	0.131066	0.0778731	0.0383086	0.00339125	0.00456353	0.00410299	0.0851162	0.127821	0.0847603		SN62	0.0252	0.0425	0.0561	0	0	0.34283	0.119	0.00188	0.0956	0.217	0.1
SN63	0.780678	0.0240528	0.00322378	0.0340172	0.0123299	0	0.00475194	0.000376805	0.103203	0.00046054	0.036906		SN63	0.0116	0.00264	0.762	0.000502	0	0.201905	0.00297	0.00214	0.0115	0.00481	0.000419
SN64	0.930689	0.042579	0.000397739	0.00546368	0.000565208	2.09336e-05	0.000711744	2.09336e-05	0.00948294	0.00106762	0.00900147		SN64	0.005	0.0041	0.925	0	0.00291	0.0189868	0.000293	0.000167	0.042	0.000272	0.001
SN65	0.964015	0.0140465	0.000188403	0.00498221	2.09336e-05	0	0.000167469	4.18673e-05	0.00854092	0.00023027	0.00776638		SN65	0.0053	0.000126	0.964	0.00511	0.000837	0.0160352	0.000126	0	0.00869	0	0.00023
SN66	0.00196776	0.00046054	0	0	4.18673e-05	0	0	0	0.99753	0	0		SN66	0.00161	0	0.00197	0.000209	0.771	0.224702	0	0	0	0.00023	0
SN67	0.857274	0.0859326	0.0022399	0.000397739	0.00341218	6.28009e-05	0	0	0.0444003	0.00385179	0.0024283		SN67	0.0147	0.00121	0.855	0.0848	0.0221	0.0194055	0.00153	0.00067	0.000649	4.19e-05	0
SN68	0.0220431	0.310153	0.0111367	0.15202	0.0149466	0.000565208	0.0741679	0.00127695	0.173498	0.0195311	0.220662		SN68	0.0466	0.00728	0.00324	0	0	0.603684	0.0104	0.000167	0.289	0.0201	0.0195
SN69	0.403559	0.28162	0.0066569	0.00722211	0.00121415	8.37346e-05	0.00221897	0.000334938	0.277957	0.00374712	0.0153862		SN69	0.00379	0.000984	0.401	0	0.00044	0.307201	0.00234	0.000565	0.279	0.0014	0.00264
S2.3 At the order level
	Actinomycetales	Bacillales	Bacteroidales	Clostridiales	Enterobacteriales	Fusobacteriales	Lactobacillales	Neisseriales	Others	Pseudomonadales	Selenomonadales
SN01	0.0420975	0.0330333	0.256898	0.0769102	0	0.0777894	0.268537	0.0315261	0.160456	0.00284697	0.0499058
SN02	0.103245	0.0105296	0.214026	0	0.0087712	0	0.342349	0	0.0152606	0	0.30582
SN03	0.0626334	0	0.10046	0.0369897	2.09336e-05	0.00290978	0.103496	0	0.0589701	0.40314	0.231379
SN04	0.386603	0.000293071	0.0401089	0.0168097	0	0.0272137	0.421457	0.0105924	0.0585514	0	0.0383714
SN05	0	0	0.00152816	0	0.848734	0	0.00280511	0	0	0.146891	4.18673e-05
SN06	0.00954574	4.18673e-05	0.0176471	0.00730584	0.157944	0.00276324	0.0126858	0.000439606	0.0215826	0.749215	0.020829
SN07	0.190706	0.000146535	0.110718	0.00540088	0.000272137	0.000293071	0.332468	0.189135	0.0254972	0.00190496	0.143458
SN08	0.396379	0.0025539	0.0913544	0.0504919	0.000146535	0.0292234	0.237429	0.0025539	0.052669	0.00439606	0.132803
SN09	0.226293	0.0106134	0.0912707	0.0467658	8.37346e-05	0.00422859	0.403936	0.0292234	0.0640151	0	0.123571
SN10	0.12646	0.431401	0.00265857	0.0375759	0.00617542	0.0855767	0.111534	0.0143814	0.166339	0.00127695	0.0166213
SN11	0.988256	0.00410299	0.000837346	0.00165376	0	0.000293071	0.000188403	4.18673e-05	0.00418673	0.000209336	0.00023027
SN12	0.0142139	0.932991	0.00267951	0.00270044	0.000669876	0.00232363	0.0141093	0.000774545	0.0239481	0.00293071	0.00265857
SN13	0.0738957	0.0139418	0.1287	0.0262298	0.00108855	0.0603726	0.28857	0.198995	0.1027	0.00238644	0.103119
SN14	0.0677203	0.592987	6.28009e-05	8.37346e-05	0.0638685	2.09336e-05	0.271886	8.37346e-05	0.0024911	0.000711744	8.37346e-05
SN15	0.0471007	0.000146535	0.0534017	0.0110739	0.000816412	0.000481474	0.0350848	0.00334938	0.754093	0.00299351	0.0914591
SN16	0.196023	0.0281767	0.449089	0.0415533	0.000607076	0.0287209	0.128993	0.00864559	0.0447143	6.28009e-05	0.0734143
SN17	0.81727	0.000418673	0.0392296	0.0519573	4.18673e-05	0.00483567	0.0070965	6.28009e-05	0.0240528	0	0.0550345
SN18	0.974231	0.000753611	0.000502407	0.000795478	0.000314005	0.00023027	0.000858279	0	0.0214151	0.000837346	6.28009e-05
SN19	0.0408206	0.0311911	0.0362989	0.0192171	6.28009e-05	0.0536739	0.704145	0.0190078	0.0368223	0	0.0587607
SN20	0.109378	0.00270044	0.131191	0.000104668	2.09336e-05	0	0.00822692	0.0244505	0.0155328	0	0.708394
SN21	0.171363	0.000481474	0.372702	0.0244714	0	0.00496127	0.198158	0.00119322	0.0508687	2.09336e-05	0.17578
SN22	0.302366	0.0135441	0.0555788	0.0544903	0	0.0201382	0.384698	0.0131882	0.0543437	0.000125602	0.101528
SN23	0.775864	4.18673e-05	0.114298	0.0220013	4.18673e-05	0.00138162	0.012288	0.000125602	0.0286582	0	0.0453004
SN24	0.00759891	0.956521	0.00357965	0.0196567	0.00092108	0.000188403	0.00177936	0.000104668	0.00567302	0.0024911	0.00148629
SN25	0.329684	0.00200963	0.302156	0.0240109	0.000376805	0.0193846	0.152502	0.00259577	0.0244296	0	0.142851
SN26	0.58139	0.000167469	0.000104668	4.18673e-05	4.18673e-05	0.000418673	0.309043	2.09336e-05	0.0264392	4.18673e-05	0.0822901
SN27	0.231463	0.00207243	0.0776638	0.0230898	0.000146535	0.00648943	0.600314	0.00337032	0.0186519	0	0.0367385
SN28	0.397635	0.0585305	0.145007	0.0229642	0.000104668	0.0202638	0.121206	0.0450911	0.164831	0.00194683	0.0224199
SN29	0.343207	0.0110111	0.309483	0.10965	0	0.0289512	0.0431233	0.00219803	0.0459912	0.000146535	0.106238
SN30	0.148524	0.000565208	0.00328658	0.000376805	0.663345	0	0.000125602	0.000314005	0.0127277	0.161126	0.00960854
SN31	0.0309818	0	0.000272137	0.000104668	0.171614	0.000209336	0.000167469	0.00835252	0.718547	0.0654595	0.0042914
SN32	0.57444	0.00462633	0.0444421	0.0325099	0	0.0765962	0.0630103	0.125351	0.0363408	0	0.0426837
SN33	0.188214	0.0224618	0.0780615	0.0284488	0	0.127318	0.231128	0.214947	0.0677203	0.000146535	0.0415533
SN34	0.082018	0.00133975	0.156709	0.000858279	2.09336e-05	4.18673e-05	0.253946	0.00127695	0.0646221	0.000732677	0.438434
SN35	0.237408	0.0226502	0.217563	0.0789826	0	0.040046	0.192296	0.000544275	0.0423906	0	0.168118
SN36	0.113146	0.532971	0.0266485	0.00837346	6.28009e-05	0.00370525	0.26793	0.000146535	0.00424953	6.28009e-05	0.0427046
SN37	0.109504	0.0136906	0.386707	0.0188821	0	0.110509	0.0545531	0.00494034	0.0377643	2.09336e-05	0.263429
SN38	0.0272347	0.933892	0.000146535	0.0175005	0.00841532	2.09336e-05	0.00219803	0.000167469	0.00713837	0.000858279	0.0024283
SN39	0.120368	0.020515	0.18564	0.0474566	4.18673e-05	0.073184	0.171719	0.138769	0.0546159	0.000104668	0.187586
SN40	0.00330752	0.0203475	0.00092108	2.09336e-05	0	0.00117228	0.0140465	0.000481474	0.000523341	0.949194	0.00998535
SN41	0.111848	0.0211011	0.093699	0.0196567	0	0.0243458	0.504438	0.0534645	0.0322169	2.09336e-05	0.139209
SN42	0.425686	0.00297258	0.00192589	0.000795478	0	0	0.509462	0.00527528	0.00988068	2.09336e-05	0.0439816
SN43	0.811032	0.000104668	0.0218338	0.11524	0.0247645	0.000251204	0.00416579	0.000125602	0.0141721	0.00567302	0.00263764
SN44	0.604354	0.00142349	0.0869374	0.0494034	6.28009e-05	0.0114088	0.169688	0.0133557	0.0290559	0	0.0343102
SN45	0.179694	0.0436048	0.17017	0.0334938	4.18673e-05	0.0247436	0.380699	0.0405694	0.0391668	2.09336e-05	0.0877957
SN46	0.196902	0.00640569	0.0441909	0.0372619	0.00171656	0.040381	0.592862	0.0155118	0.0155537	0	0.049215
SN47	0.0779569	0.000251204	0.247394	0.297279	0.000146535	0.0257065	0.29081	4.18673e-05	0.0221478	0	0.0382667
SN48	0.00272137	2.09336e-05	0.101214	0.00280511	0	0	0.888026	0	0.00510781	0	0.000104668
SN49	0.750618	0.00127695	0.000125602	0.000104668	2.09336e-05	2.09336e-05	0.243186	0	0.0043542	0	0.000293071
SN50	0.0020515	4.18673e-05	0	0	0.351832	0	0.645468	0	0	0.000607076	0
SN51	0.00125602	0.291857	0.0985347	0.0116182	2.09336e-05	2.09336e-05	0.507641	0.000502407	0.0416789	4.18673e-05	0.0468285
SN52	0.195039	0.0352522	0.387733	0.0252878	0.000272137	0.0697928	0.088633	0.00173749	0.0490685	0	0.147184
SN53	0.330835	0.0046682	0.35717	0.0351057	4.18673e-05	0.0279045	0.131966	0.0070965	0.0380992	0	0.0671132
SN54	0.410551	0.0155537	0.220243	0.0143605	0	0.0418045	0.0986393	0.00357965	0.0178983	0	0.177371
SN55	2.09336e-05	0	0.000104668	0.00023027	0.000334938	0	0.978522	0	0.00046054	0	0.0203266
SN56	0.000376805	0.0138999	8.37346e-05	0	0.000355872	0	0.977308	0	0.00795478	2.09336e-05	0
SN57	0.383756	0.00906427	0.28095	0.0527737	0	0.00822692	0.0197614	0.000209336	0.0885912	0	0.156667
SN58	0.443542	0.00387272	0.000879213	0.000732677	0.000104668	6.28009e-05	0.284028	0.21928	0.04731	8.37346e-05	0.000104668
SN59	0.264936	0.00221897	0.34394	0.170128	0.000586142	0.0155956	0.102407	0.00307725	0.0559556	0	0.0411555
SN60	0.656395	0.000648943	4.18673e-05	0.000502407	0.338706	0	0.00177936	0	0.00190496	0	2.09336e-05
SN61	0.717898	0.0256437	0.000146535	8.37346e-05	0.00169563	4.18673e-05	0.253569	0	0.000816412	0	0.000104668
SN62	0.113481	0.100607	0.131066	0.0383086	0.00512874	0.00410299	0.223404	0.00651036	0.170777	0.0787942	0.127821
SN63	0.780678	0.0165585	0.00322378	0.0123299	0.000314005	0.000376805	0.00749424	0.00642663	0.0736027	0.0985347	0.00046054
SN64	0.930689	0.042286	0.000397739	0.000565208	0.00347498	2.09336e-05	0.000293071	0	0.0154909	0.00571488	0.00106762
SN65	0.964015	0.0088968	0.000188403	2.09336e-05	0.00115135	4.18673e-05	0.00514968	0	0.0129789	0.00732677	0.00023027
SN66	0.00196776	0	0	4.18673e-05	0.995897	0	0.00046054	0	0	0.00163282	0
SN67	0.857149	0.000795478	0.0022399	0.00341218	0.0295583	0	0.0851371	0	0.00303538	0.014821	0.00385179
SN68	0.0220431	0.289826	0.0111367	0.0149466	0.0023655	0.00127695	0.0203266	4.18673e-05	0.455097	0.163408	0.0195311
SN69	0.40337	0.279694	0.0066569	0.00121415	0.000879213	0.000334938	0.00192589	0.00100482	0.0244086	0.276764	0.00374712

## Sheet: S3
Supplementary Table S3: Comparison the relative abundance of the top 10 bacterial microbiome between mild and severe groups
Levels	Microbiome	p_value
phylum	Actinobacteria	0.826
	Bacteroidetes	0.006
	Candidatus_Saccharibacteria	0.011
	Cyanobacteria	0.658
	Firmicutes	0.104
	Fusobacteria	0.001
	Proteobacteria	0.219
	Spirochaetes	＜0.001
	Synergistetes	0.001
	Tenericutes	0.901
class	Actinobacteria	0.826
	Bacilli	0.406
	Bacteroidia	0.001
	Betaproteobacteria	0.092
	Clostridia	＜0.001
	Epsilonproteobacteria	0.058
	Flavobacteriia	0.037
	Fusobacteriia	0.001
	Gammaproteobacteria	0.139
	Negativicutes	0.008
order	Actinomycetales	0.816
	Bacillales	0.163
	Bacteroidales	0.001
	Clostridiales	＜0.001
	Enterobacteriales	0.021
	Fusobacteriales	0.001
	Lactobacillales	0.328
	Neisseriales	0.011
	Pseudomonadales	0.035
	Selenomonadales	0.008
family	Actinomycetaceae	0.029
	Corynebacteriaceae	0.185
	Enterobacteriaceae	0.021
	Enterococcaceae	0.232
	Micrococcaceae	0.005
	Moraxellaceae	0.068
	Prevotellaceae	0.003
	Staphylococcaceae	0.36
	Streptococcaceae	0.036
	Veillonellaceae	0.007
genus	Acinetobacter	0.047
	Actinomyces	0.036
	Corynebacterium	0.185
	Enterococcus	0.232
	Klebsiella	0.093
	Prevotella	0.003
	Rothia	0.003
	Staphylococcus	0.464
	Streptococcus	0.035
	Veillonella	0.005

## Sheet: S4
Supplementary Table S4.1: Rank correlation coefficients between clinical characteristics and top 10 genera
	Mild group					Severe group
	Age	Inpatient_days	Dyspnea	Coexisting_disorders	ICU admission	Age	Inpatient_days	Dyspnea	Coexisting_disorders	ICU admission
Acinetobacter	-0.0986782	-0.00895782	0.203985	-0.00252975	0.0364238	-0.0961541	0.659874	0.644922	0.0786214	0.491362
Actinomyces	-0.323523	0.183136	-0.107727	-0.0651623	-0.354225	-0.418789	-0.230917	-0.316896	-0.206039	-0.364529
Corynebacterium	0.165423	0.31945	0.264244	0.202575	0	0.289236	0.0845554	-0.199192	0	-0.208302
Enterococcus	0.342924	-0.0134789	0.123299	0.154135	0.373651	0.249698	-0.106619	-0.172167	0.242536	0.19033
Klebsiella	-0.00863089	-0.0889605	0.273676	0.0520114	0.0967927	0.125729	0.238484	0.210145	0.106269	0.424862
Prevotella	-0.480473	0.118314	-0.145909	-0.418773	-0.373259	-0.437868	-0.0383877	-0.221918	-0.206123	-0.165763
Rothia	-0.278788	0.123829	-0.194604	-0.279267	-0.354225	-0.35139	-0.156234	-0.29005	-0.139692	-0.418866
Staphylococcus	0.232458	-0.154538	0.0316943	0.153294	-0.198887	0.131717	-0.0465365	0.142683	-0.296762	-0.22622
Streptococcus	-0.0394857	-0.140994	-0.166731	-0.0372194	-0.267946	-0.223044	-0.426652	-0.475539	-0.0343539	-0.582539
Veillonella	-0.272196	0.0223911	-0.173693	-0.251253	-0.349317	-0.357994	-0.029065	-0.185687	-0.146004	-0.0663052
Supplementary Table S4.2: Rank correlation coefficients between clinical indexes and top 10 genera
	Mild group					Severe group
	WBC	GRA	LYMPH	CRP		WBC	GRA	LYMPH	CRP
Acinetobacter	-0.126826	0.0156318	-0.322692	-0.0814712	Acinetobacter	0.211376	0.365136	-0.48824	0.519991
Actinomyces	-0.298439	-0.362385	0.385497	-0.0549044	Actinomyces	-0.251302	-0.373614	0.150541	-0.399891
Corynebacterium	-0.110714	-0.0777381	-0.121692	-0.0962637	Corynebacterium	-0.118663	-0.0530998	-0.0999042	0.385658
Enterococcus	0.063219	0.153893	-0.261207	0.1208	Enterococcus	0.0559821	0.143946	-0.244471	0.121938
Klebsiella	0.385218	0.368275	0.0597817	0.0305143	Klebsiella	0.425735	0.501161	-0.268792	0.29392
Prevotella	-0.21488	-0.294576	0.370393	-0.185224	Prevotella	-0.169705	-0.145674	-0.0268346	-0.0120482
Rothia	-0.31335	-0.424961	0.313679	-0.30119	Rothia	-0.236061	-0.418374	0.396662	-0.450663
Staphylococcus	-0.171563	0.0261428	-0.323089	-0.166123	Staphylococcus	-0.260513	-0.303326	-0.00890497	0.105747
Streptococcus	0.0860281	-0.0308389	0.213094	-0.144606	Streptococcus	-0.0918438	-0.317634	0.510405	-0.461117
Veillonella	-0.306921	-0.333595	0.169985	-0.186784	Veillonella	-0.198081	-0.248905	0.000821468	-0.323384
